# Supplementary material for: Synthesis and Reactivity of Fluorinated Dithiocarboxylates to Prepare Thioamides—Effective Access to a 4-Styrenylthioamide-Cinchona Alkaloid Monomer
Source: MDPI journal article supplement (doi:10.3390/molecules28217333), 2023-10-30

# Synthesis and reactivity of fluorinated dithiocarboxylates to prepare thioamides. Effective access to a 4-styrenylthioamide-cinchona alkaloid monomer.

Aimar Gonzalo-Barquero<sup>1</sup>, Bénédicte Lepoittevin<sup>1</sup>, Jacques Rouden<sup>1</sup> and Jérôme Baudoux<sup>1,\*</sup>

<sup>1</sup> Normandie Université, Laboratoire de Chimie Moléculaire et Thioorganique, UMR 6507, ENSICAEN, UNICAEN, CNRS, 6 Bd du Maréchal Juin, 14050 Caen, France

\* Correspondence: jerome.baudoux@ensicaen.fr

## Methyl dithiobenzoate 2a

<sup>1</sup>H NMR

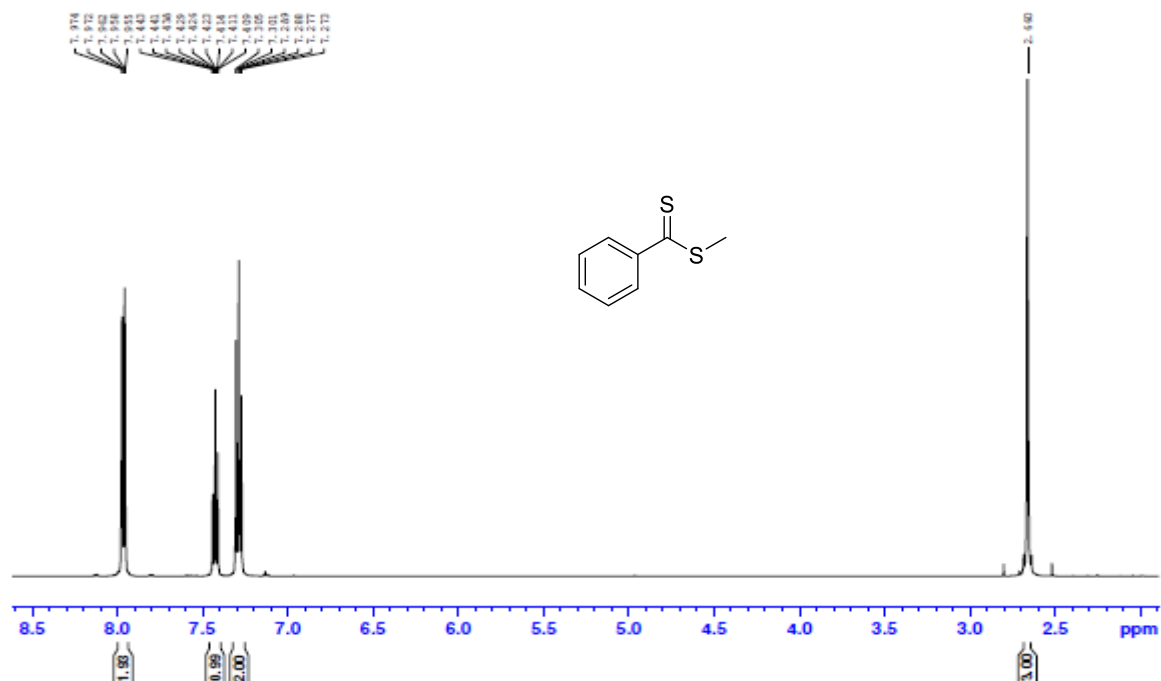

<sup>13</sup>C NMR

# Supporting Information

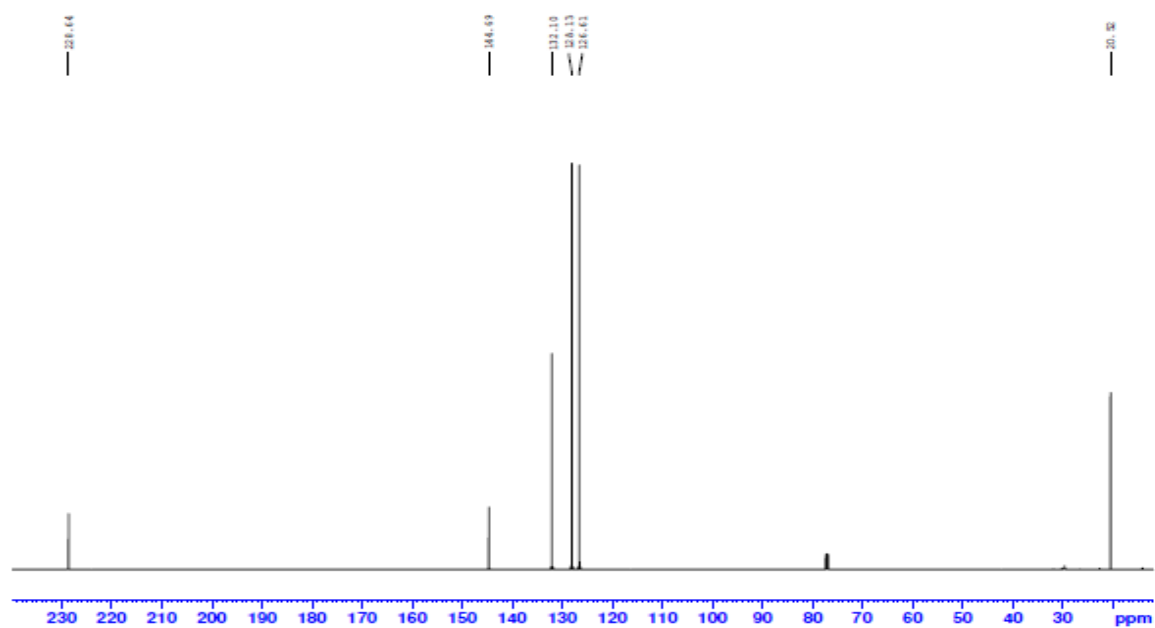

## Ethyl dithiobenzoate 2b

<sup>1</sup>H NMR

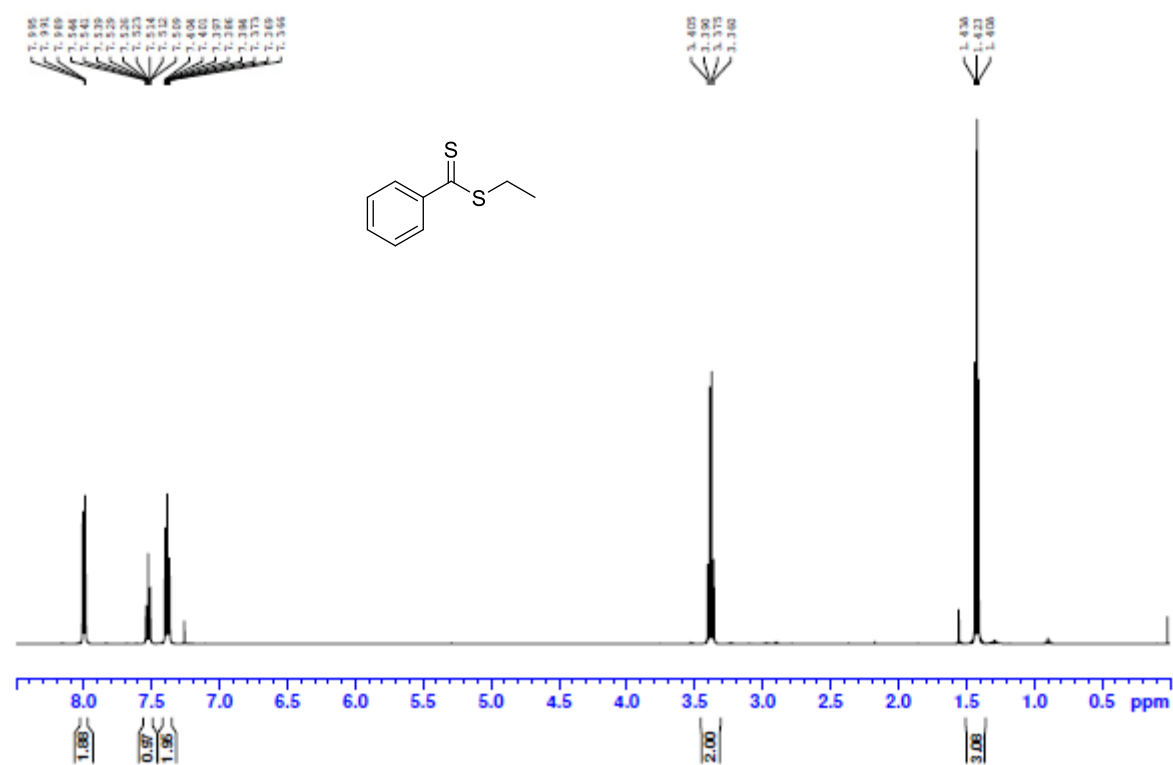

<sup>13</sup>C NMR

# Supporting Information

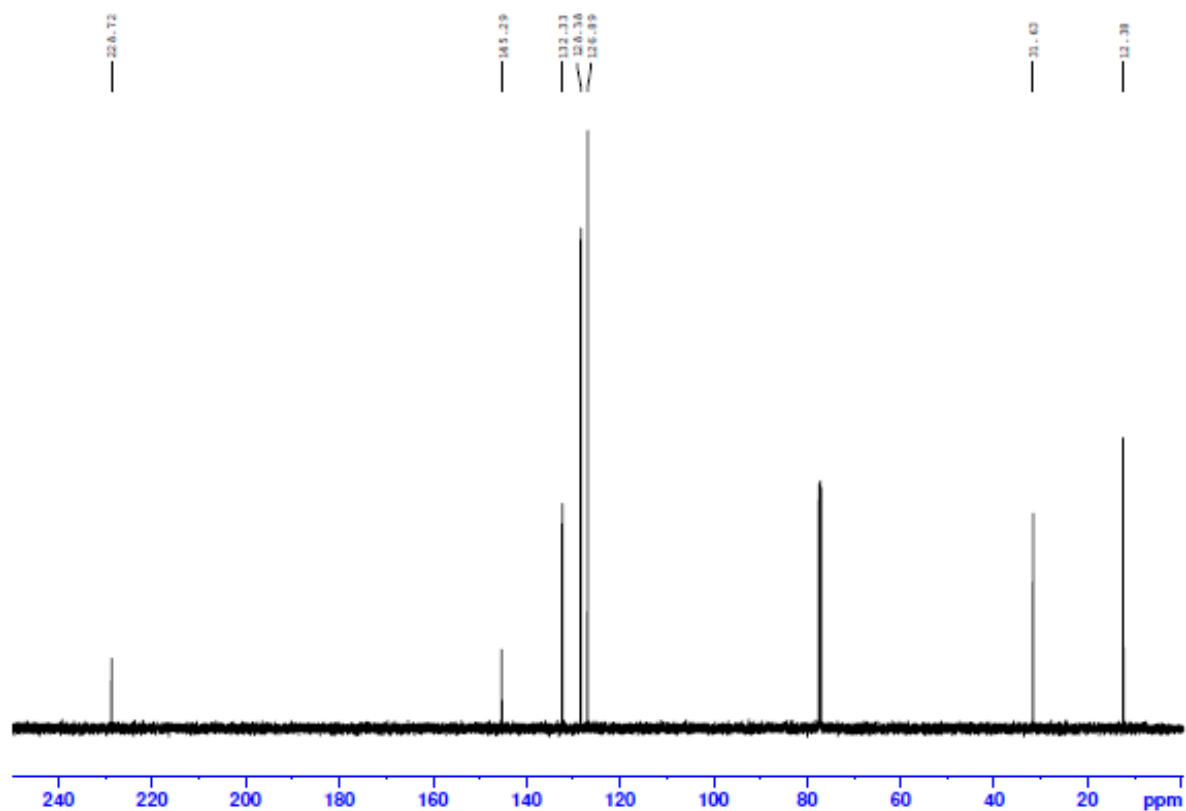

## 2,2,2-trifluoroethyl dithiobenzoate 2c

<sup>1</sup>H NMR

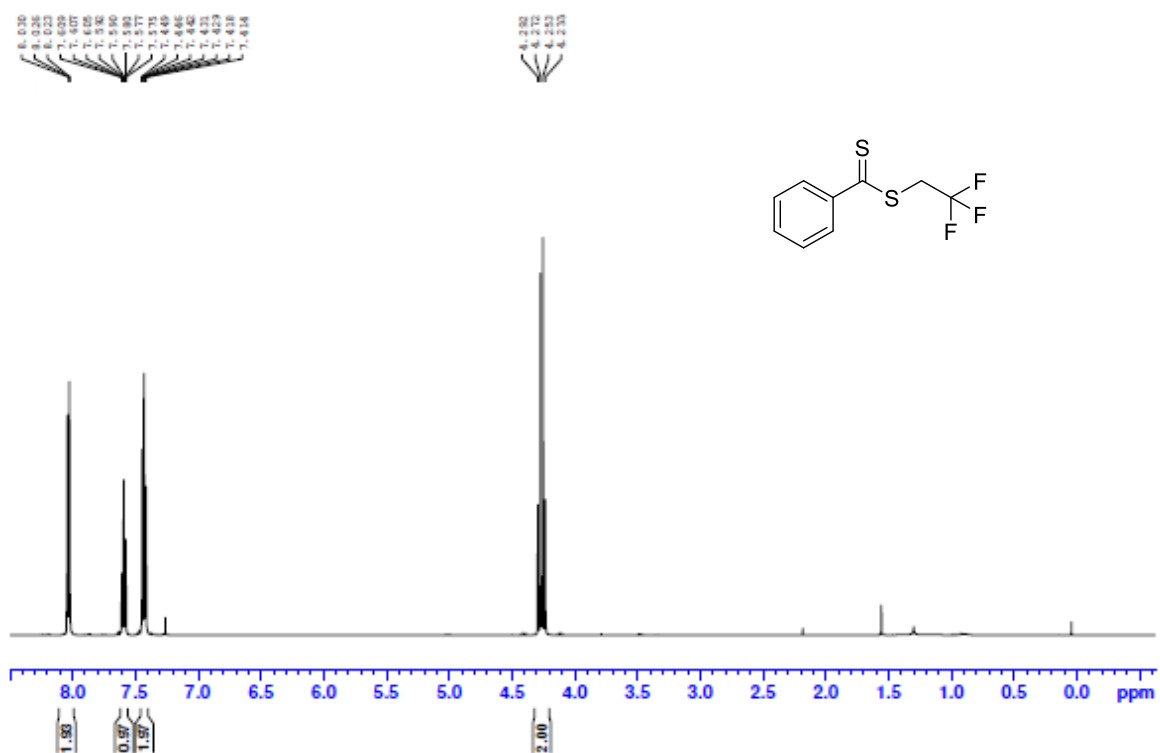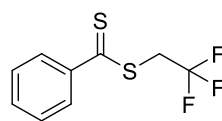

## Supporting Information

$^{13}\text{C}$  NMR

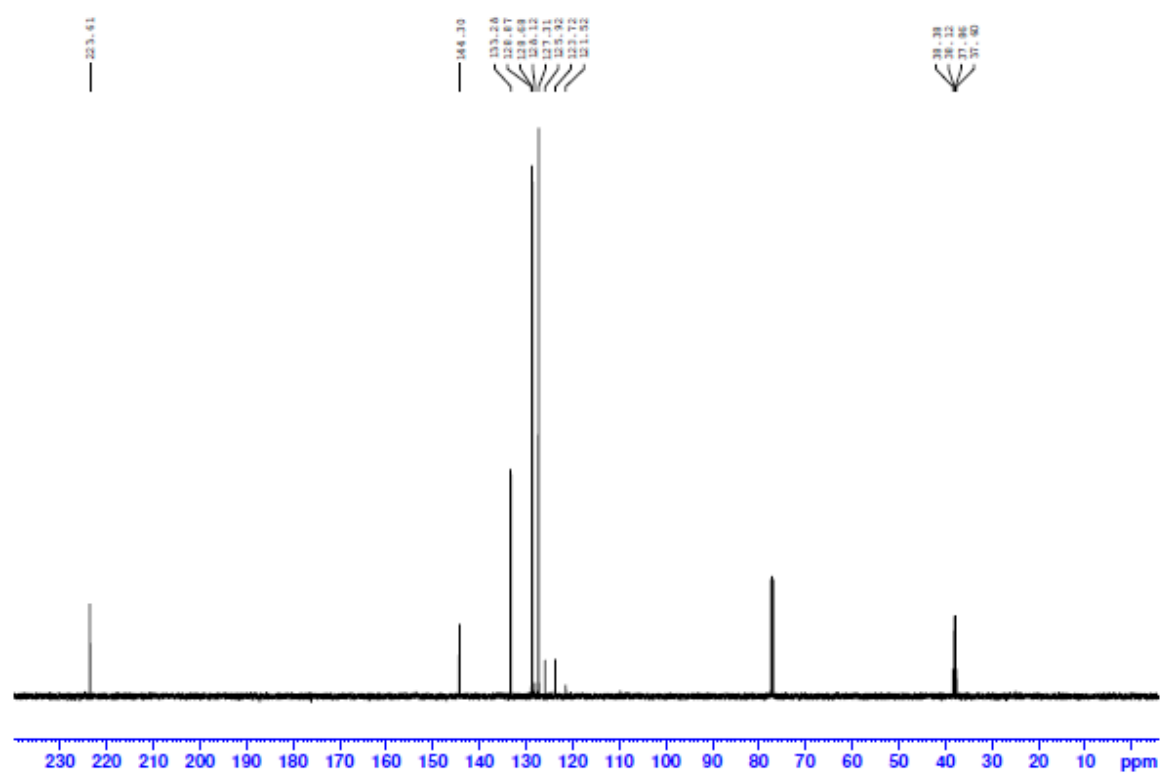

$^{19}\text{F}$  NMR

## Supporting Information

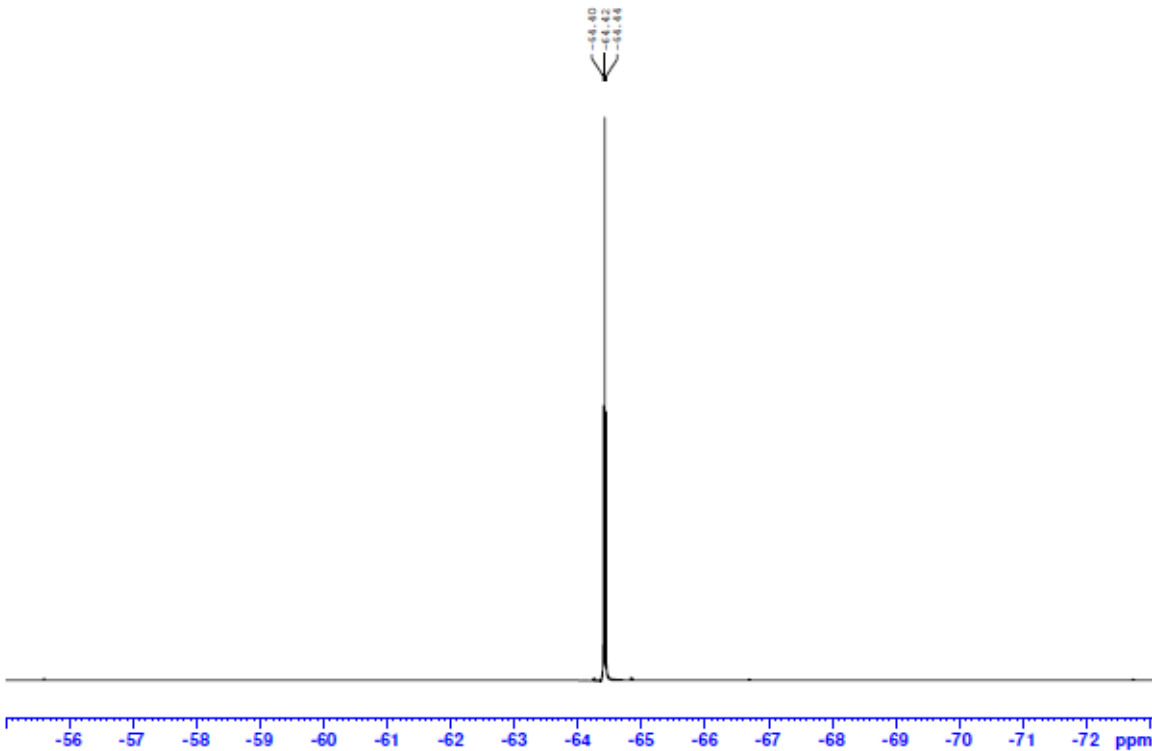

**2,2,2-trifluoropropyl dithiobenzoate 2d**

<sup>1</sup>H NMR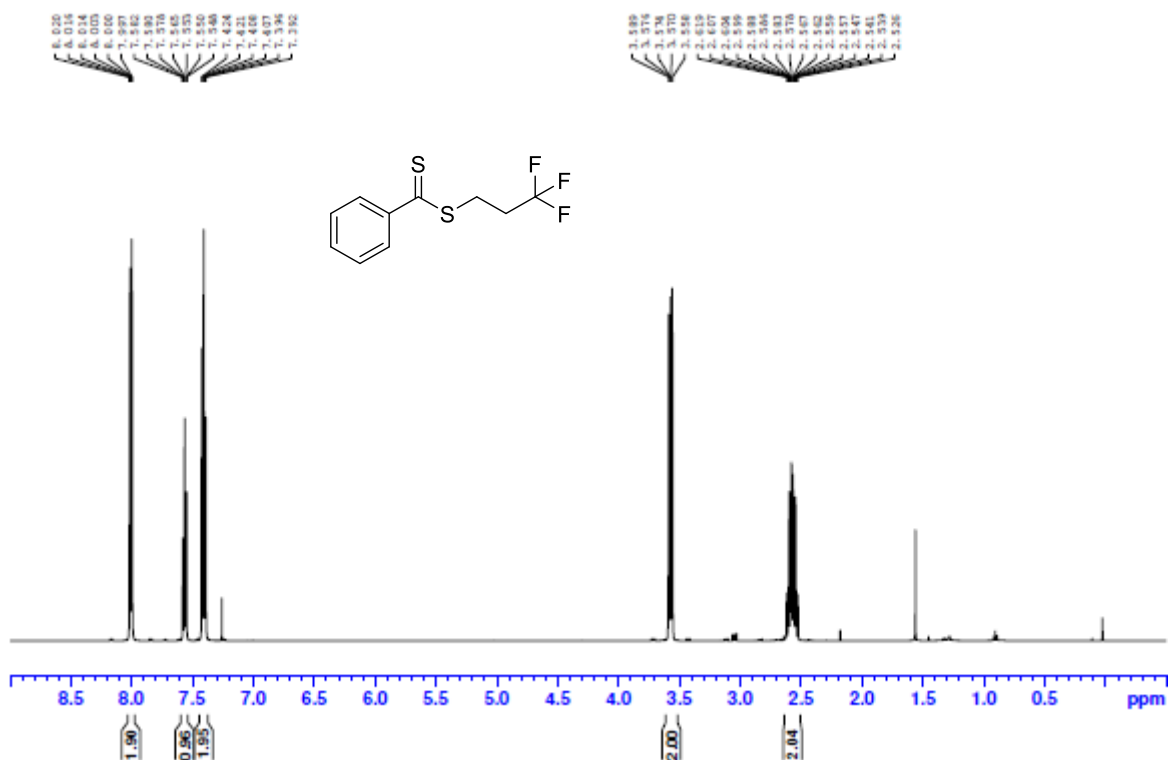

## Supporting Information

$^{13}\text{C}$  NMR

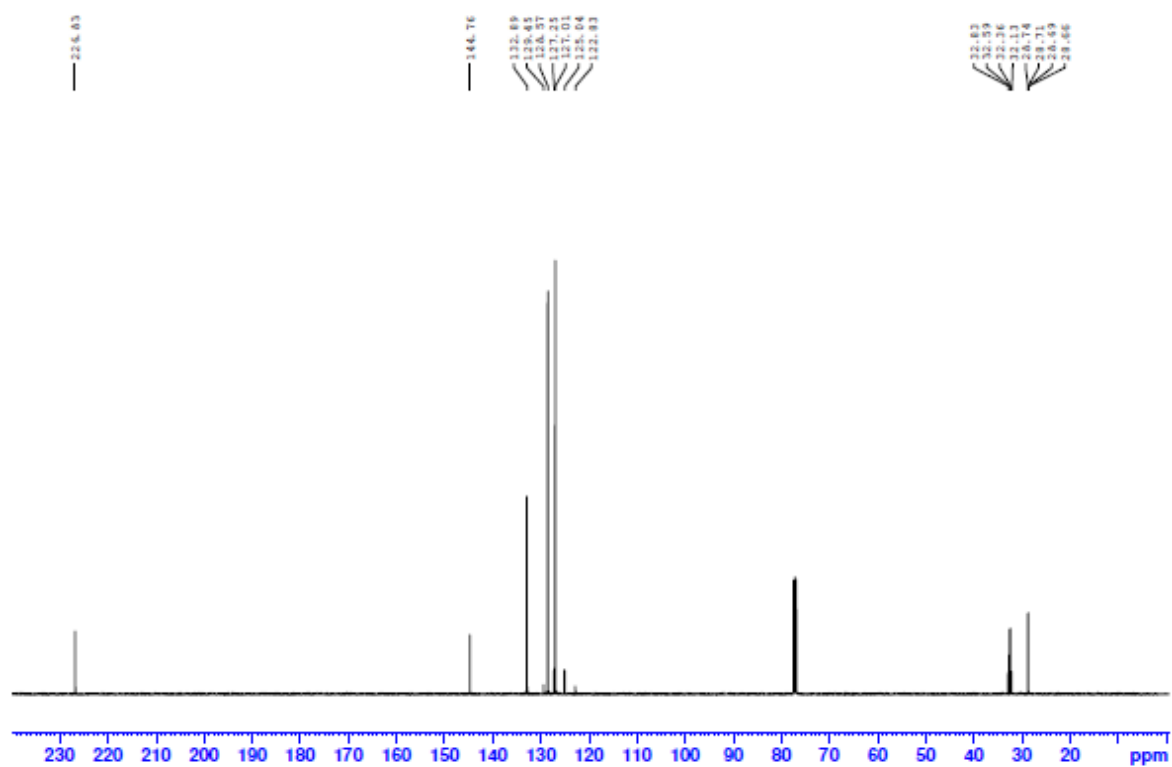

$^{19}\text{F}$  NMR

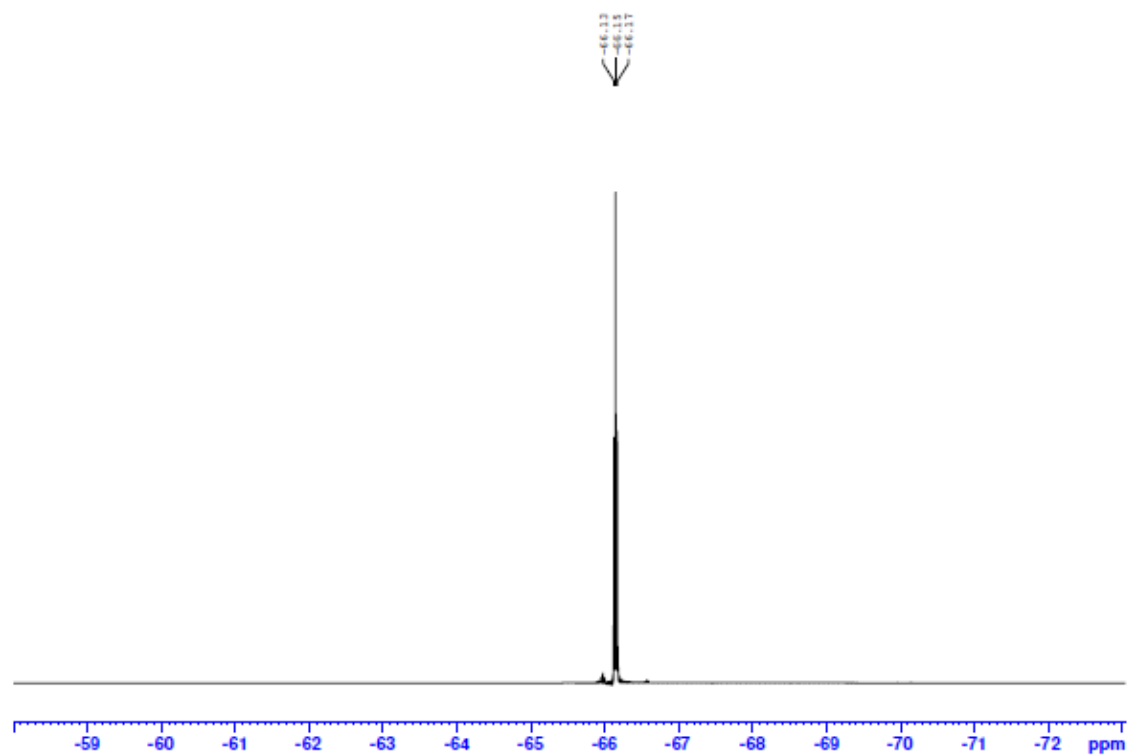

## Supporting Information

### Benzyl dithiobenzoate 2e

$^1\text{H}$  NMR

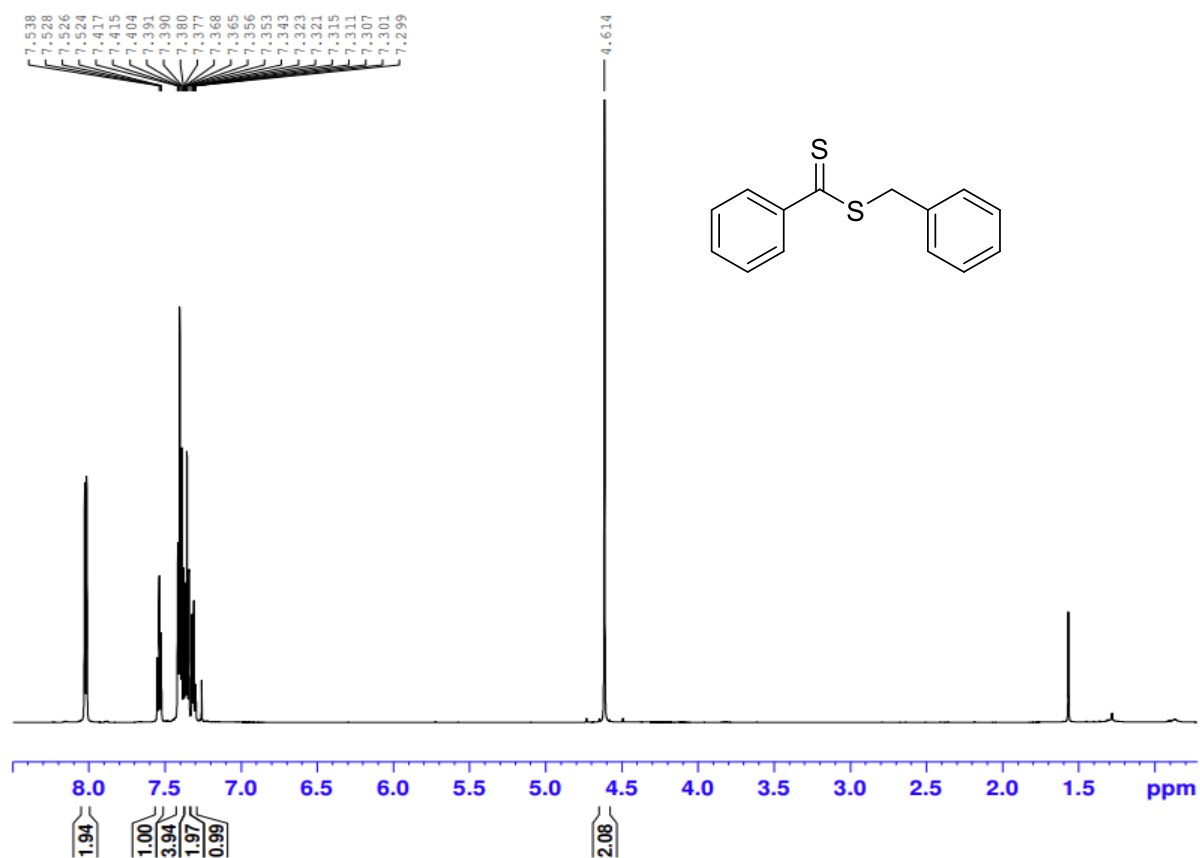

$^{13}\text{C}$  NMR

## Supporting Information

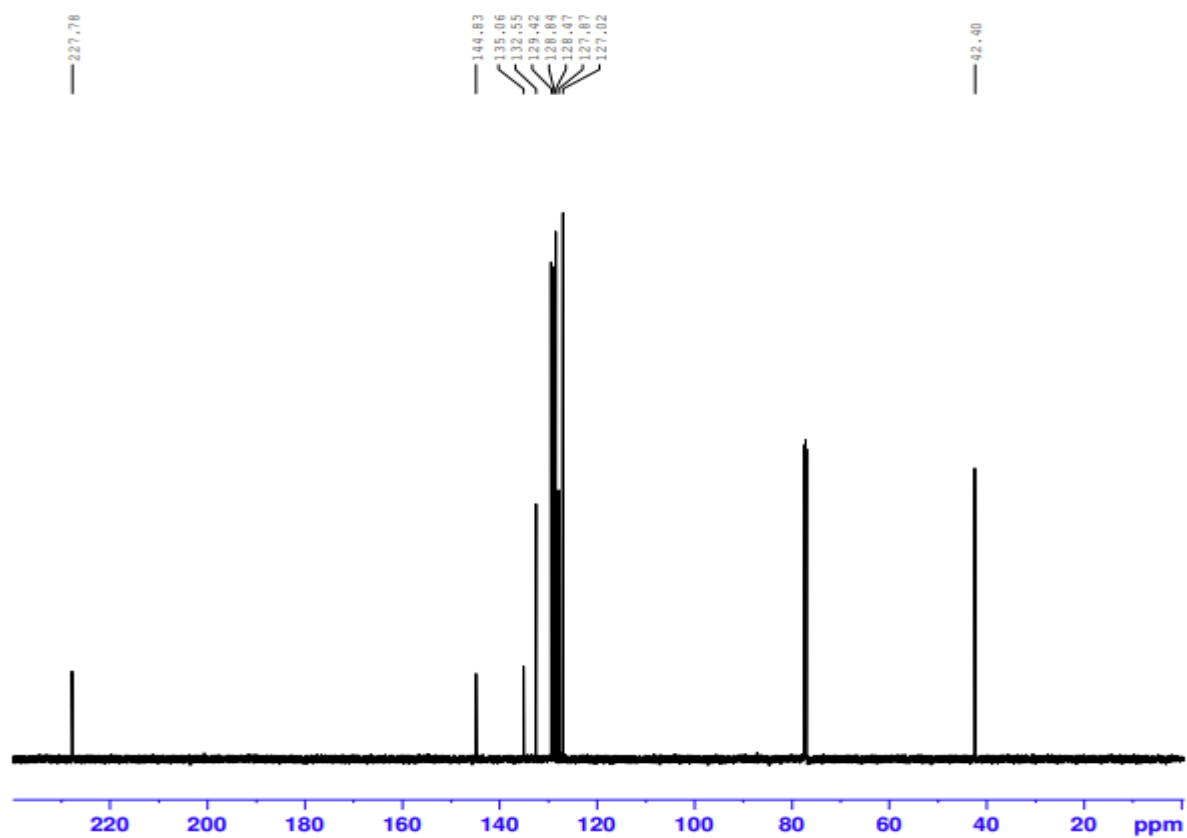

**Methyl 4-vinyldithiobenzoate 3a**

<sup>13</sup>C NMR



# Supporting Information

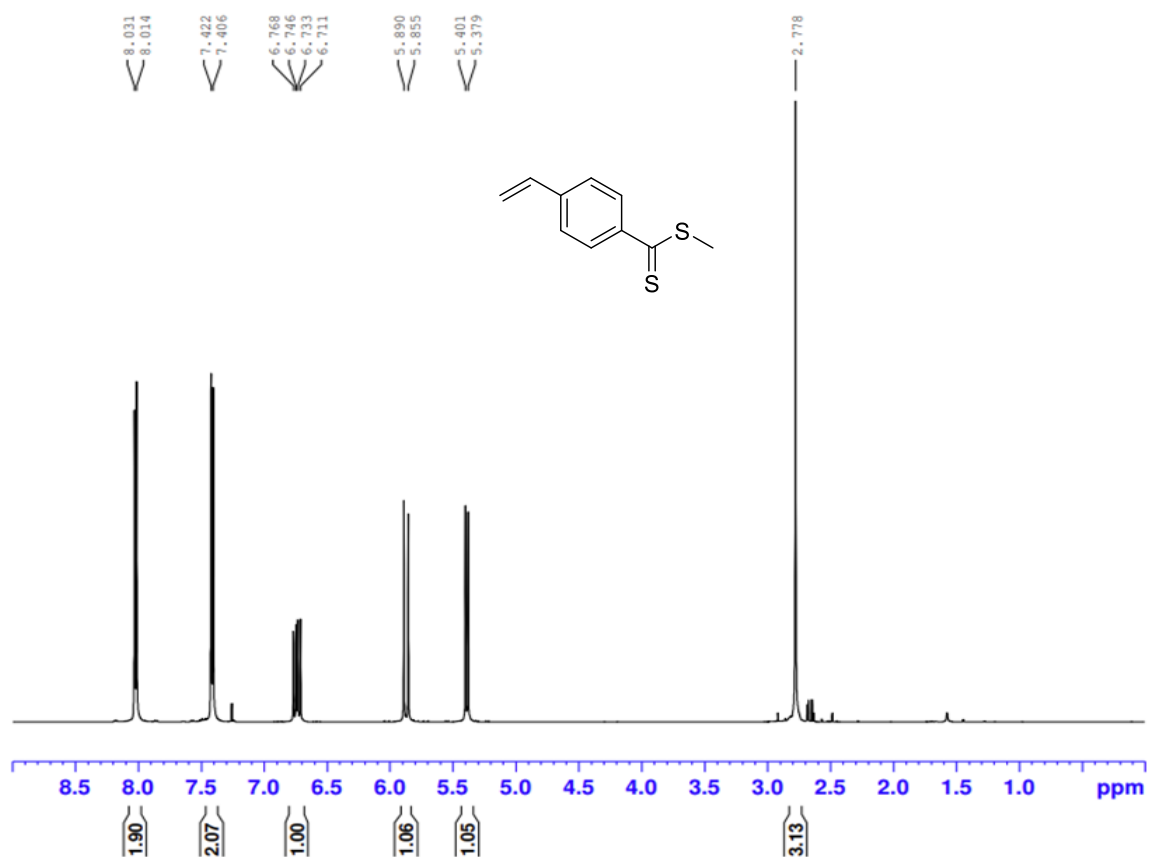

## <sup>13</sup>C NMR

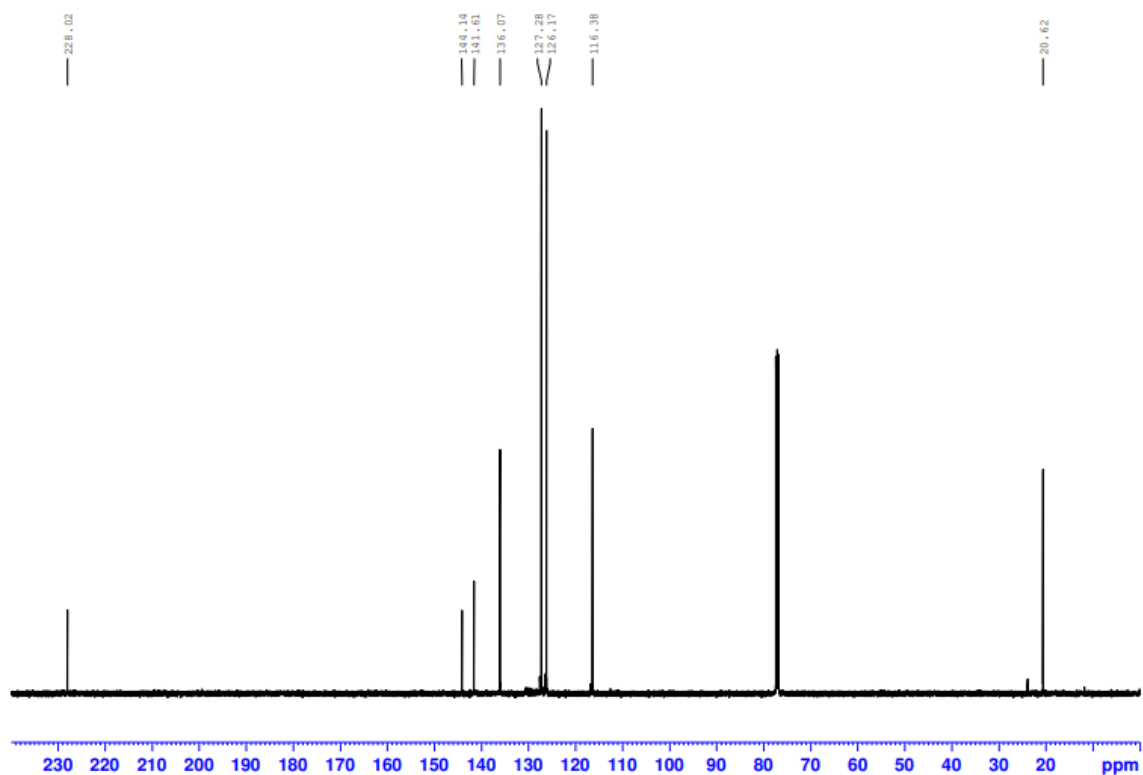

**Ethyl 4-vinyldithiobenzoate 3b**

# Supporting Information

$^1\text{H}$  NMR

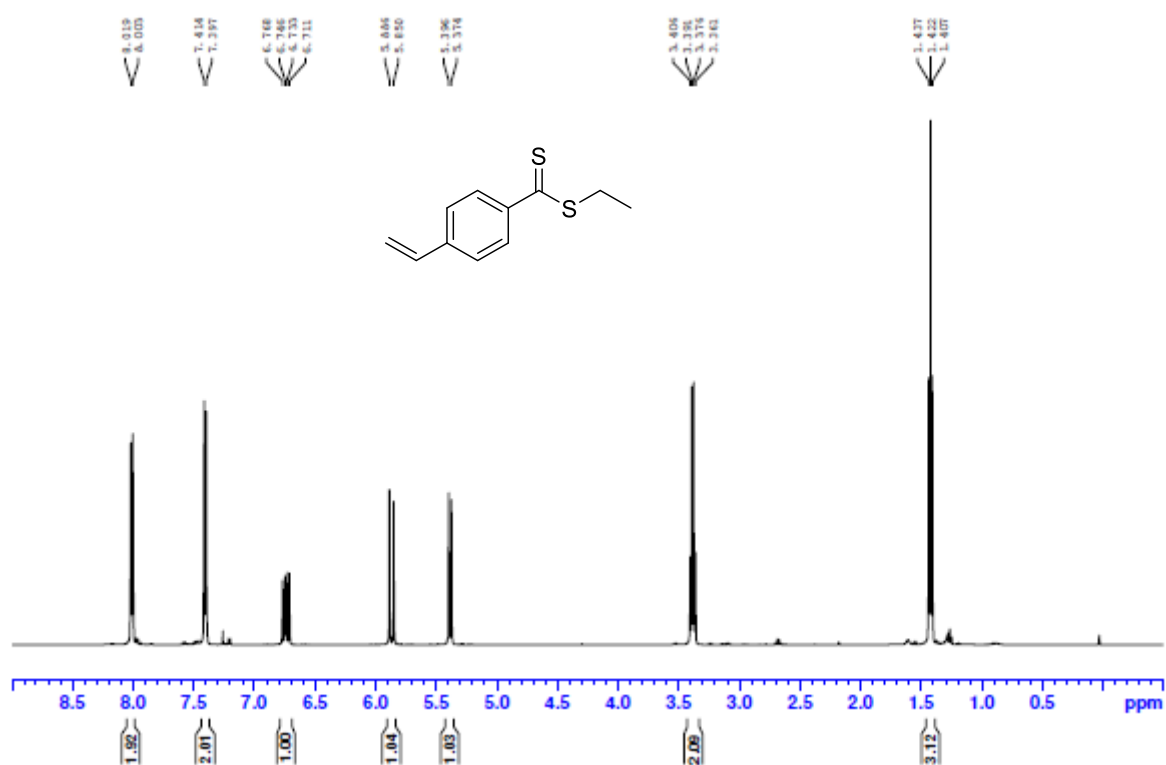

$^{13}\text{C}$  NMR

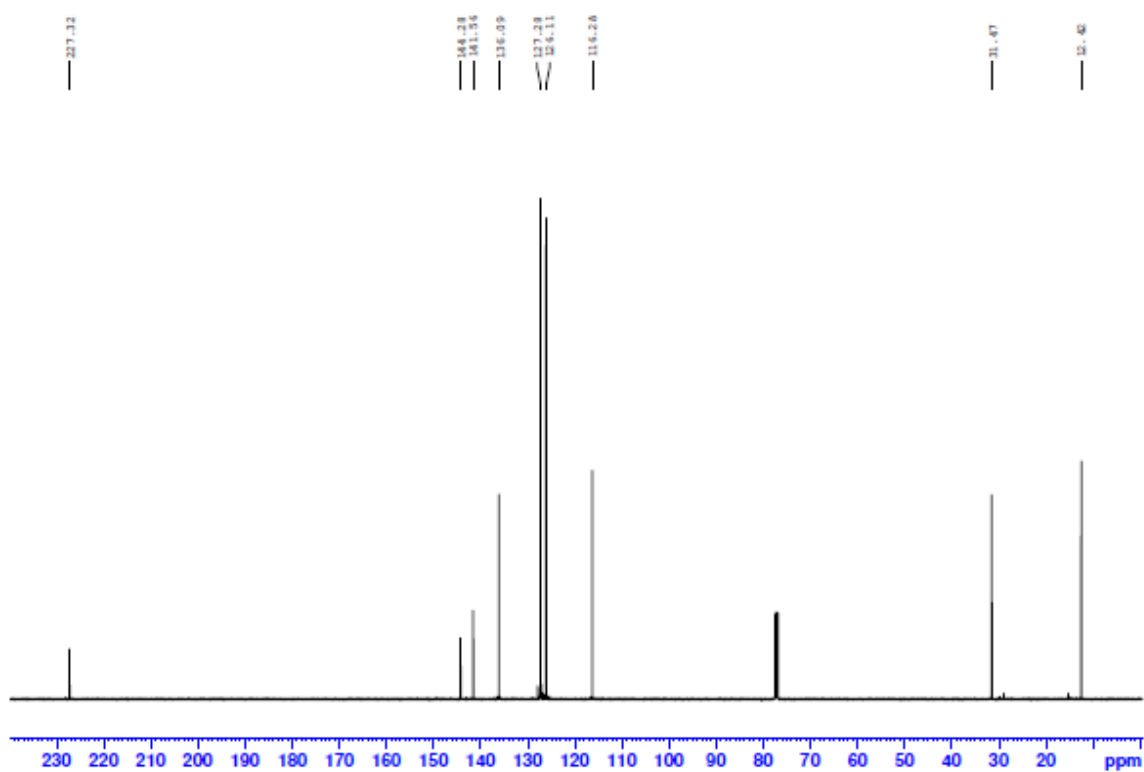

### 2,2,2-trifluoroethyl 4-vinyldithiobenzoate 3c

Figure 1 displays five phylogenetic trees (a-e) showing relationships between taxa. The trees are rooted and show bootstrap values at the nodes. Tree (a) has 8 tips with bootstrap values 8, 0, 0, 1, 7, 9, 9, 7. Tree (b) has 8 tips with bootstrap values 7, 4, 0, 9, 7, 9, 6, 6. Tree (c) has 8 tips with bootstrap values 6, 7, 2, 0, 6, 7, 0, 7. Tree (d) has 4 tips with bootstrap values 5, 0, 0, 6 and 5, 0, 5, 1. Tree (e) has 4 tips with bootstrap values 5, 4, 0, 9 and 5, 3, 8, 7.

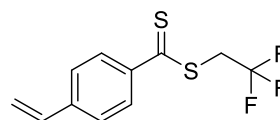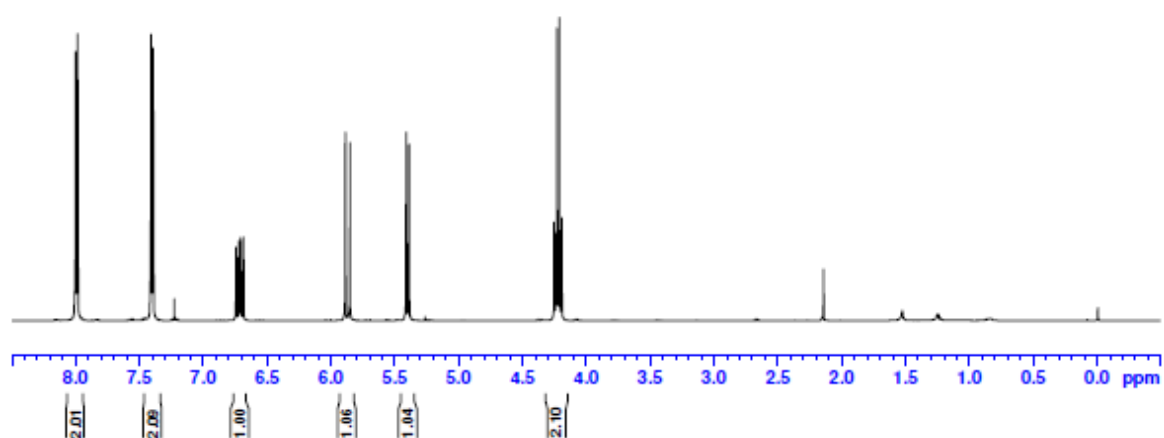

143.24  
142.56  
135.90  
128.18  
127.79  
126.39  
125.98  
125.16  
124.51  
117.09  
36.36  
35.10  
31.64  
27.58

# Supporting Information

$^{19}\text{F}$  NMR

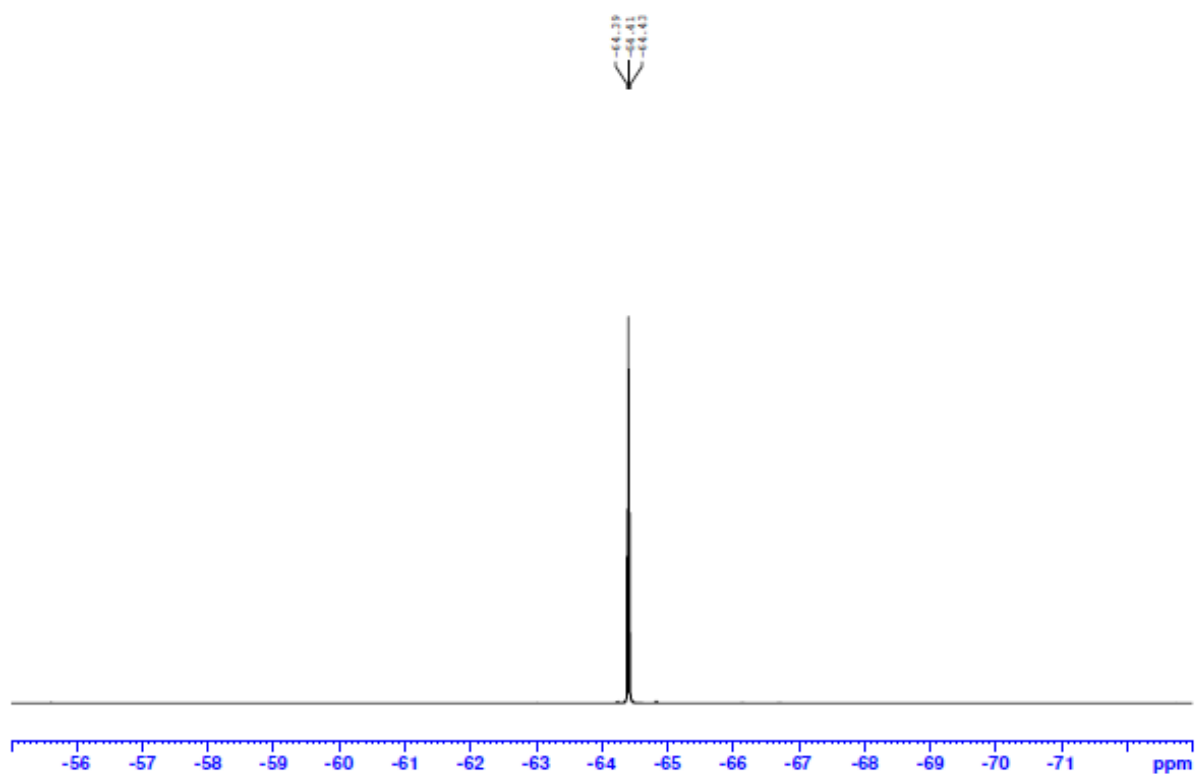

2,2,2-trifluoropropyl 4-vinyldithiobenzoate 3d

$^1\text{H}$  NMR

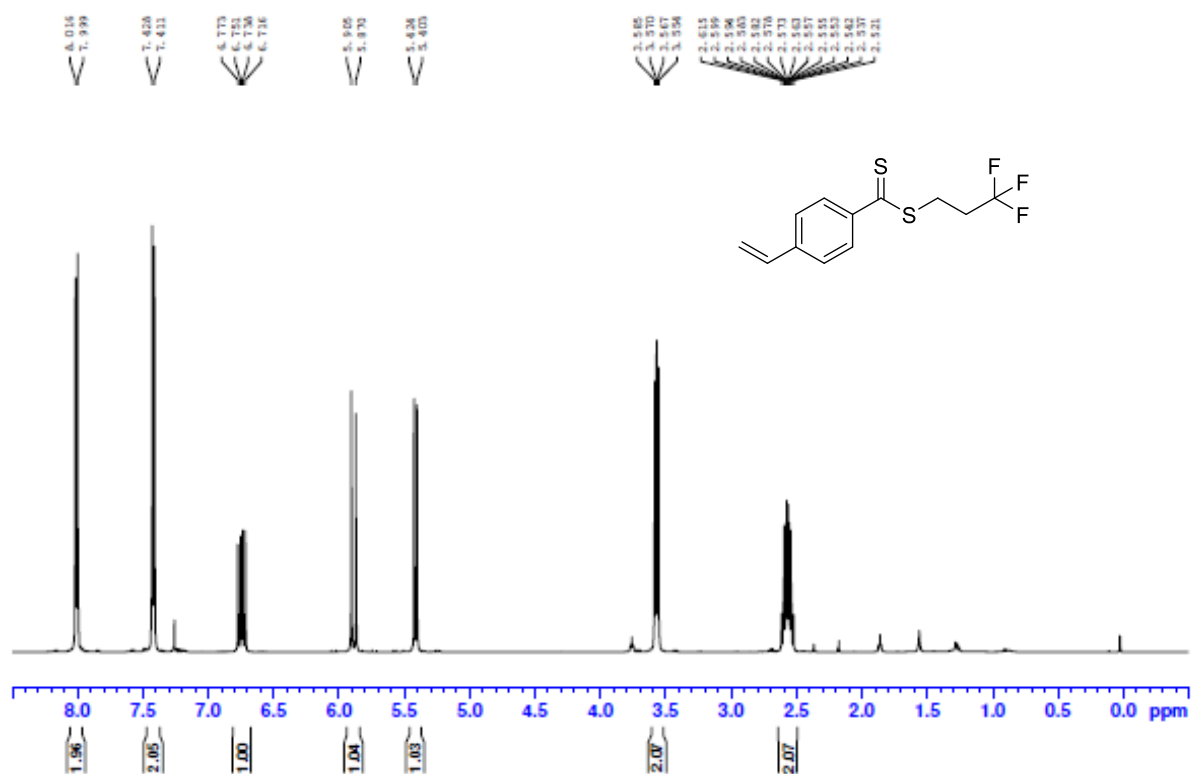

## Supporting Information

$^{13}\text{C}$  NMR

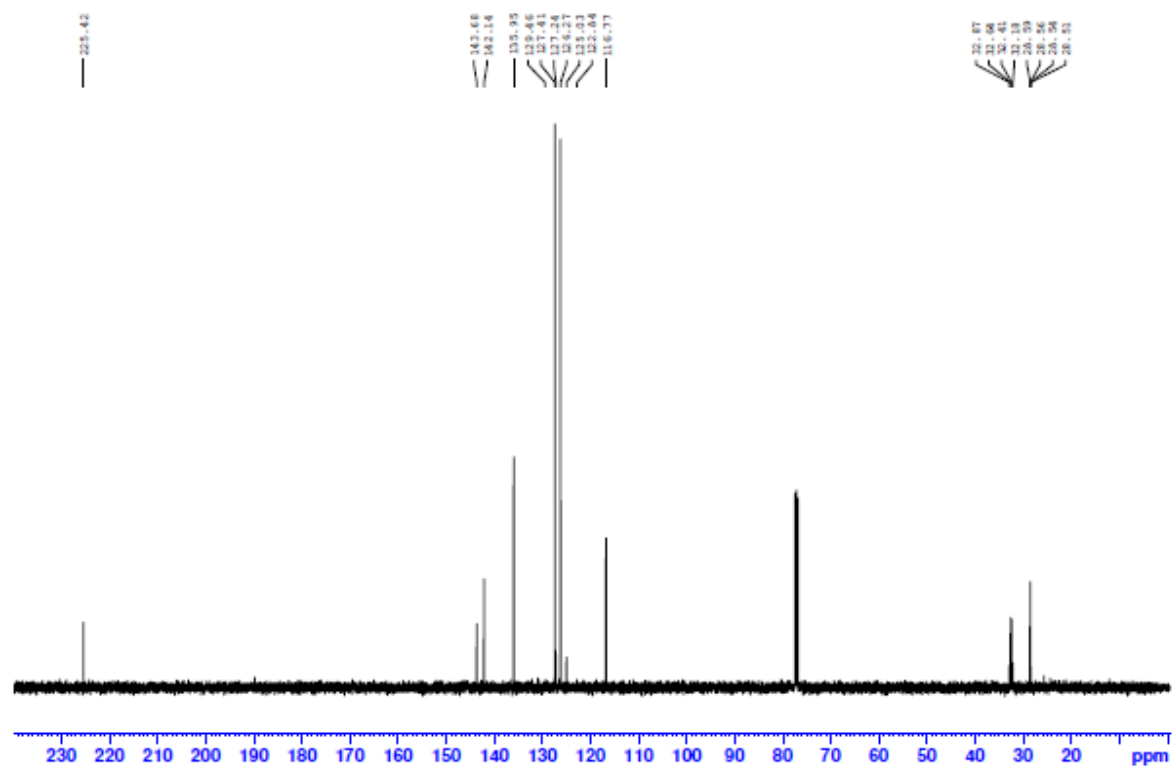

$^{19}\text{F}$  NMR

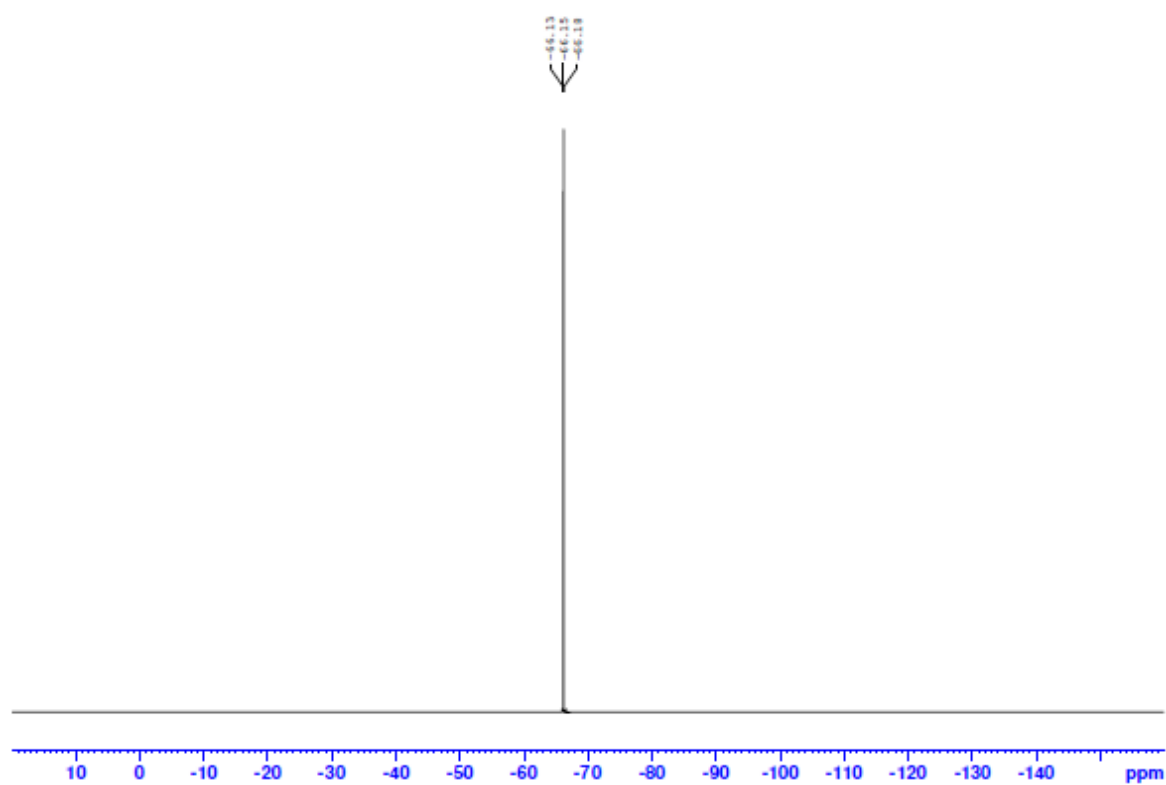

## Supporting Information

### 2,2,2-trifluoroethyl 4-vinylthiobenzoate **4**

$^1\text{H}$  NMR

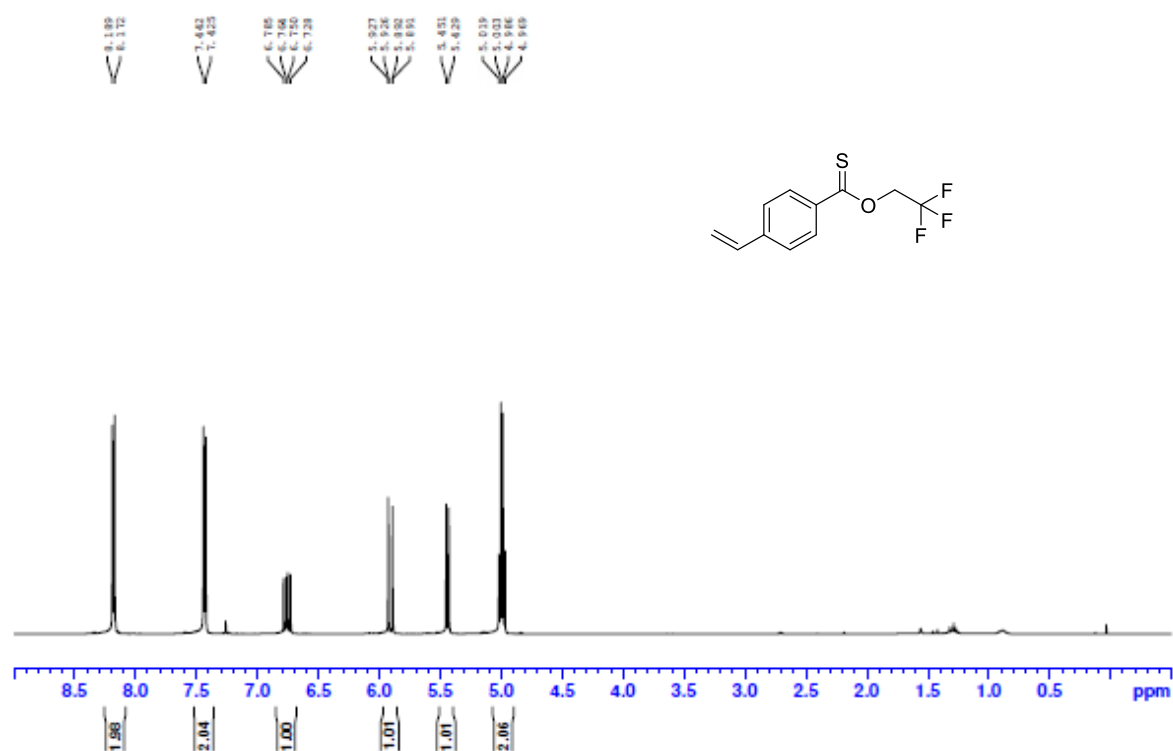

$^{13}\text{C}$  NMR

# Supporting Information

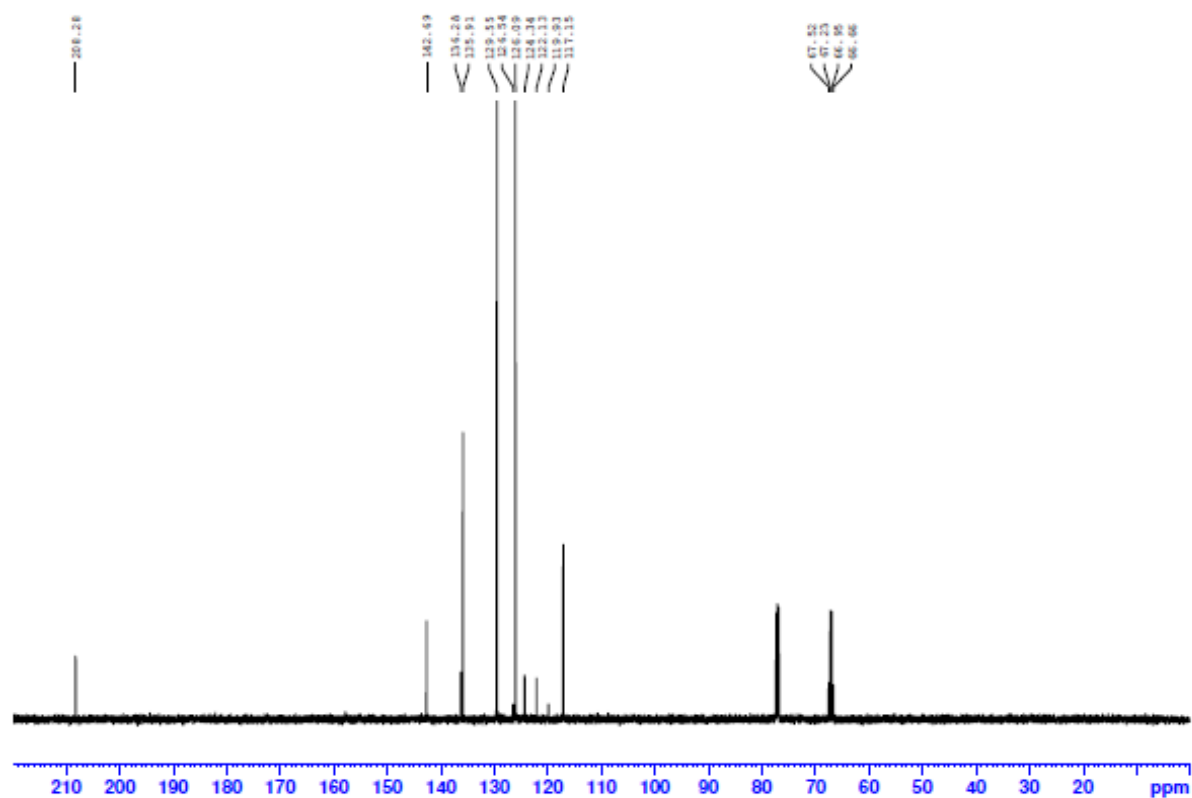

<sup>19</sup>F NMR

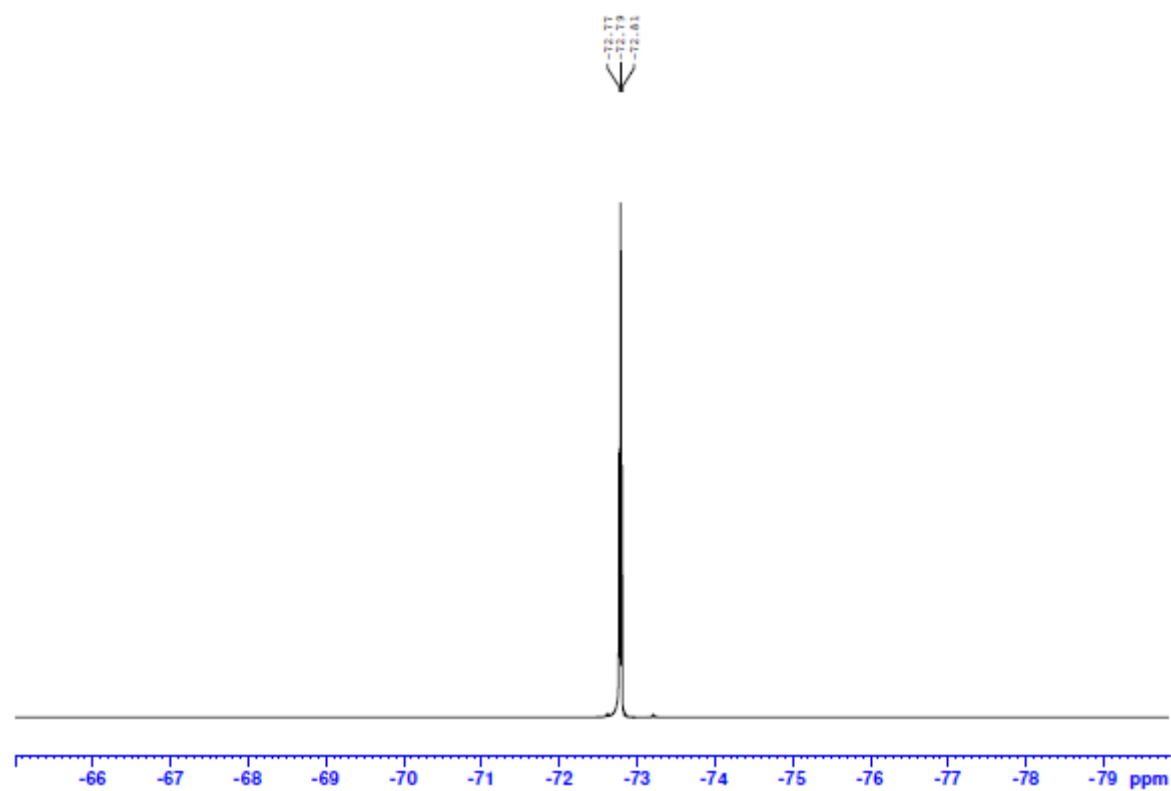

## Supporting Information

### *N*-benzyl-4-vinylbenzothioamide 5a

$^1\text{H}$  NMR

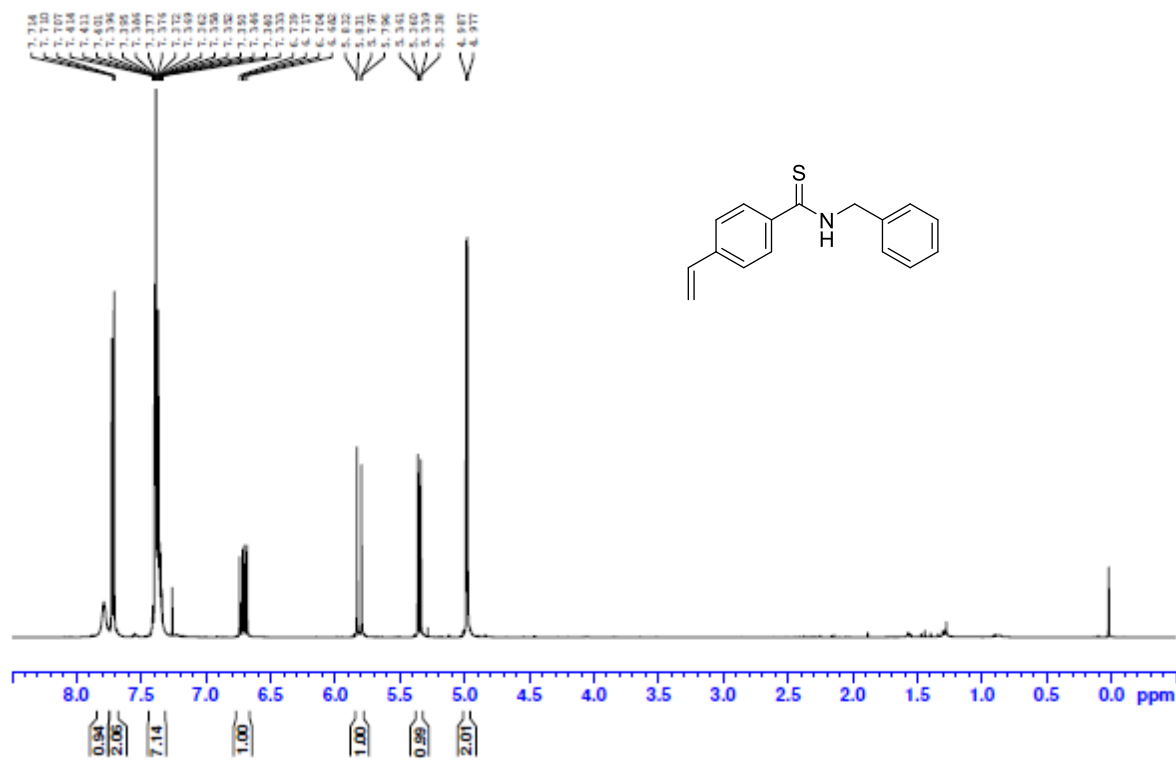

$^{13}\text{C}$  NMR



# Supporting Information

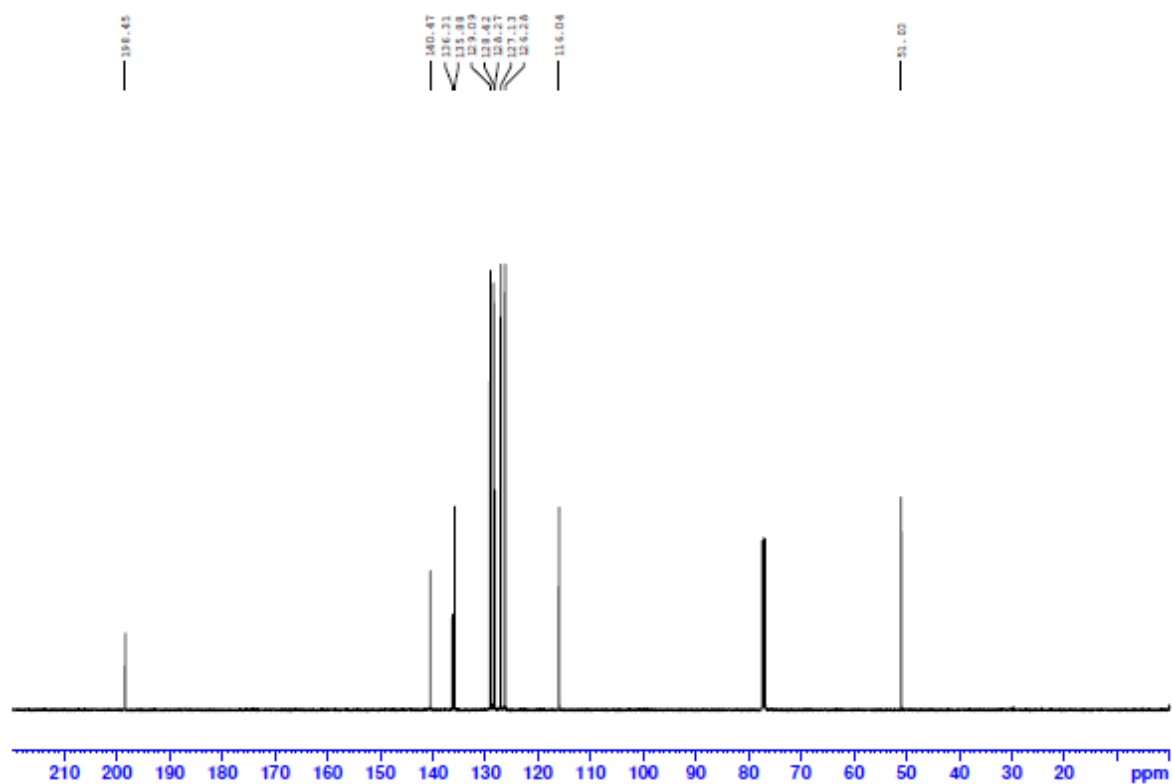

## 4-vinyl-*N*-propan-2-ylbenzothioamide 5b

<sup>1</sup>H NMR

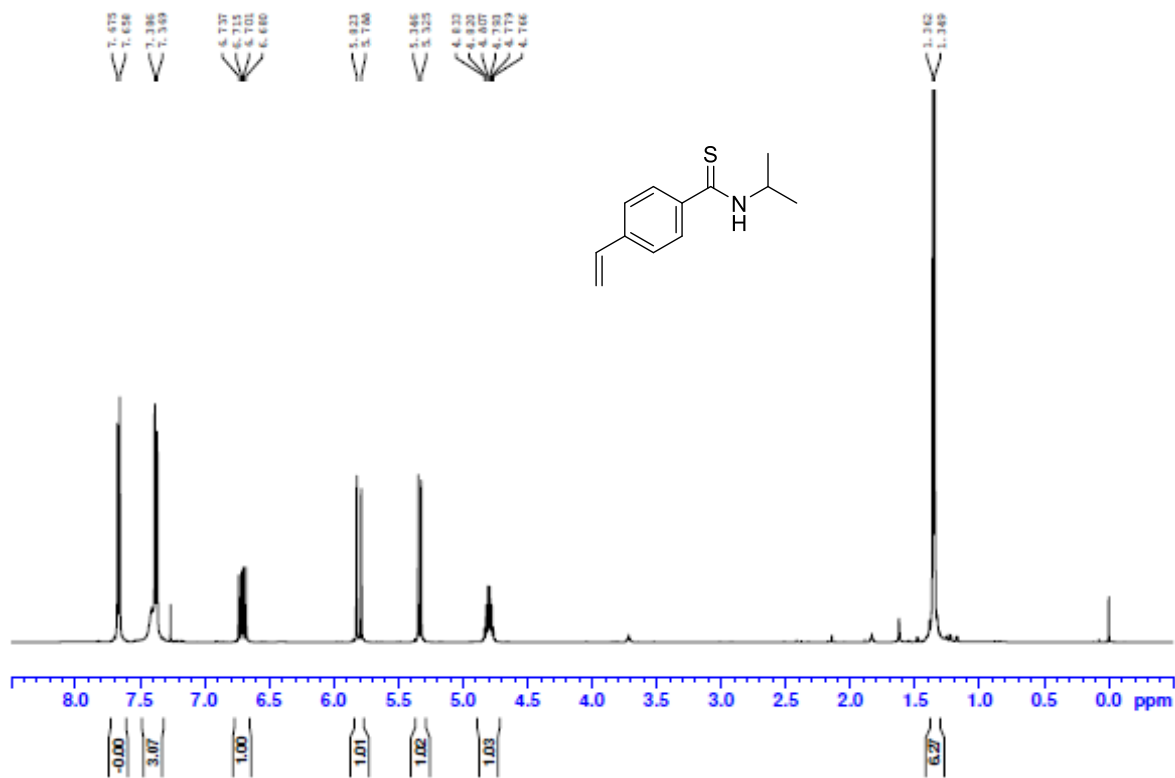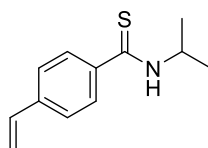

## Supporting Information

<sup>13</sup>C NMR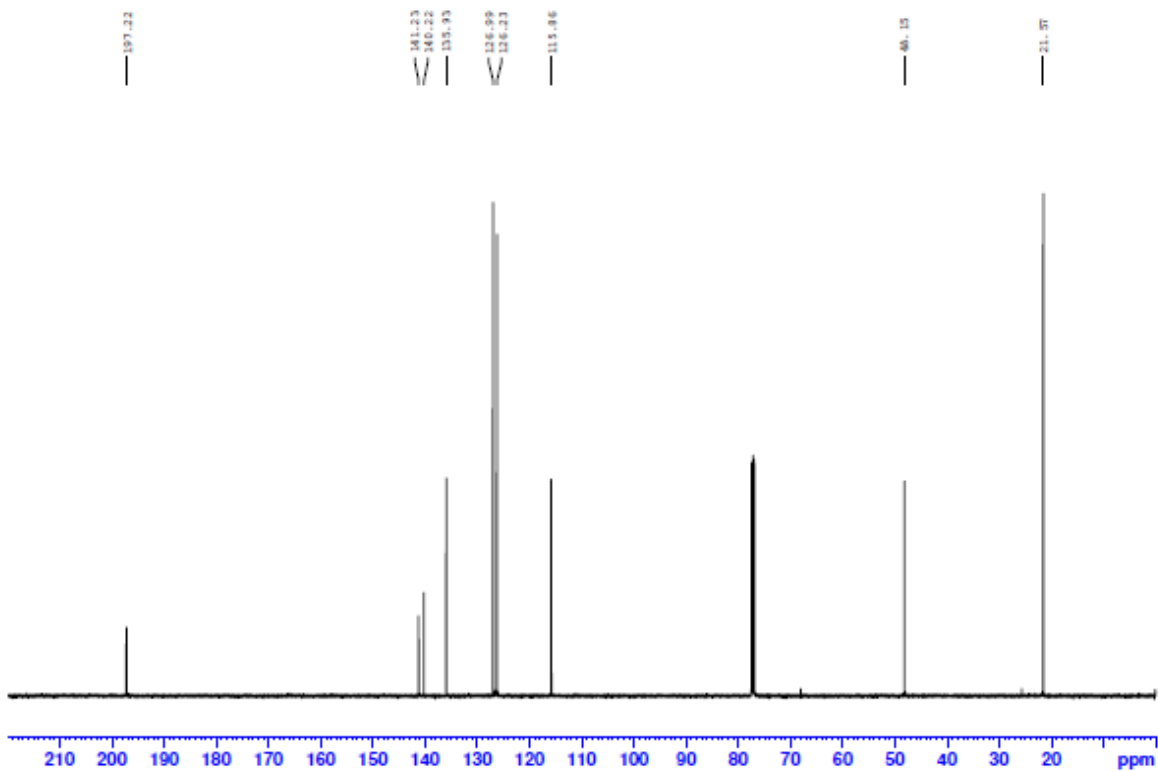

**4-vinyl-*N*-(1-phenylethyl)benzothioamide 5c**

<sup>1</sup>H NMR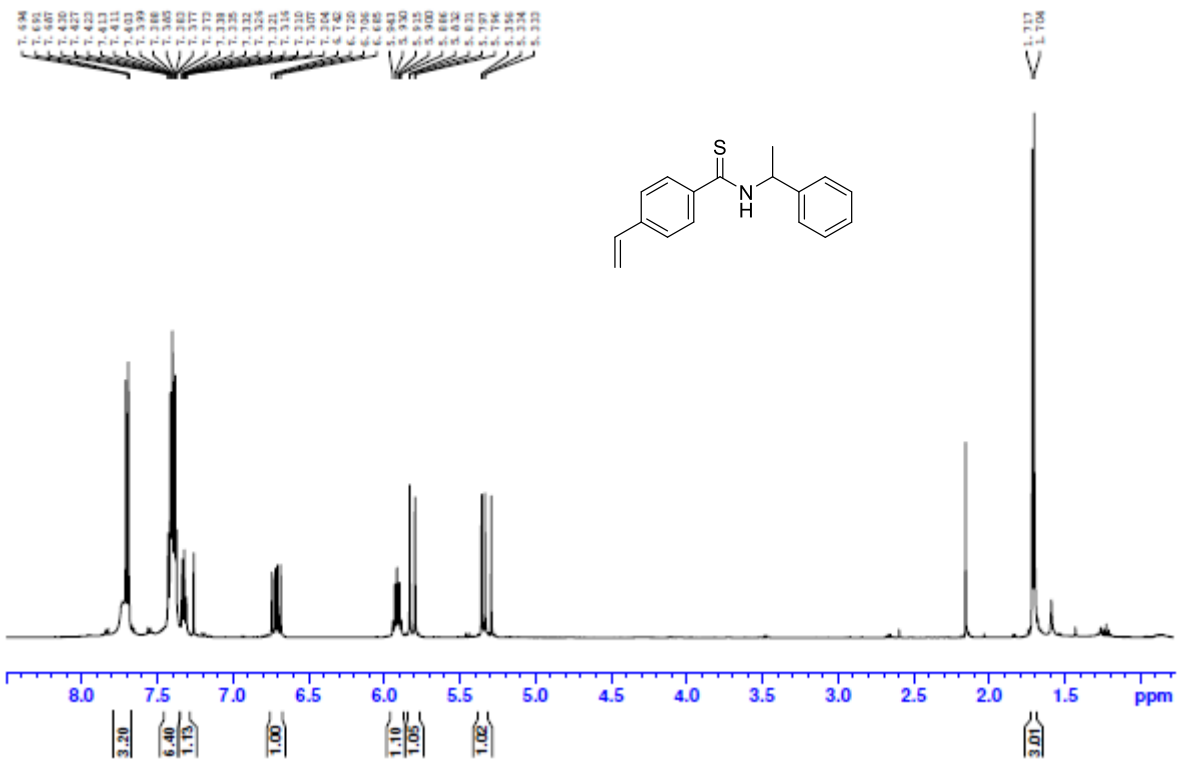

## Supporting Information

$^{13}\text{C}$  NMR

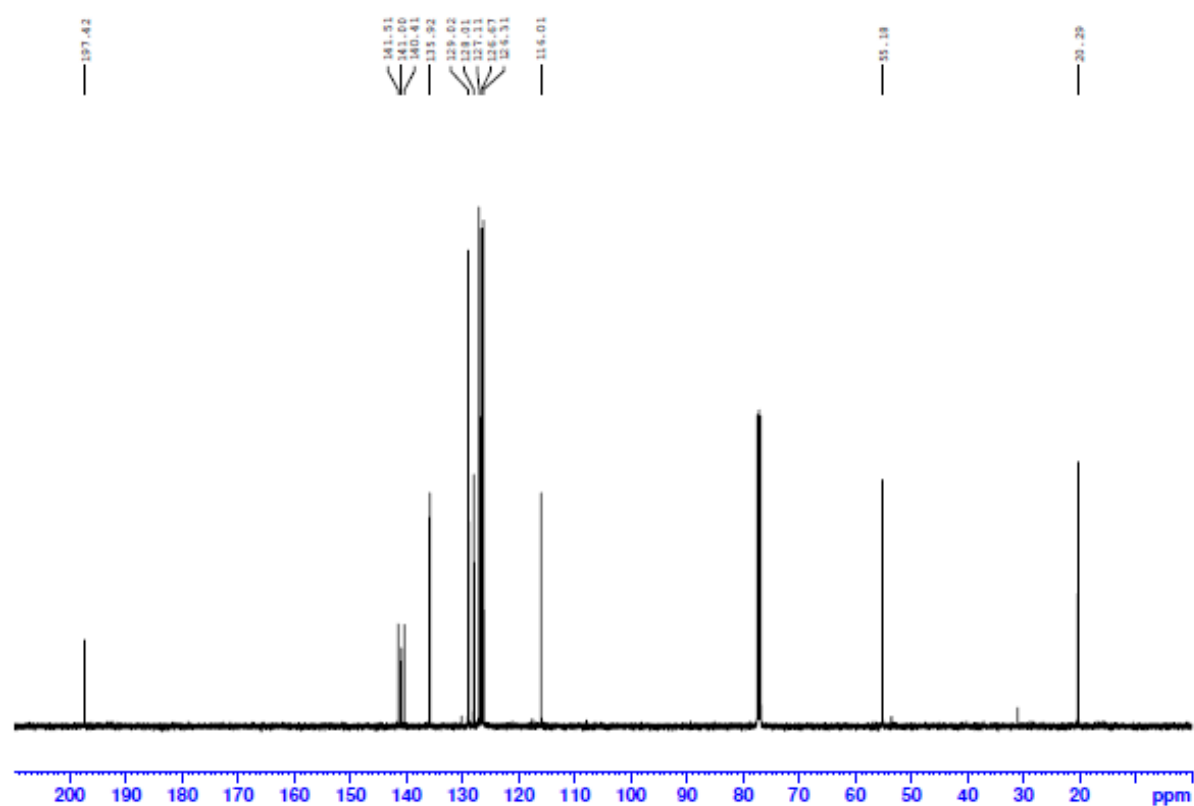

*N*-(9-Deoxyepicinchonidin-9-yl)-4-vinylbenzothioamide 5d

$^1\text{H}$  NMR

# Supporting Information

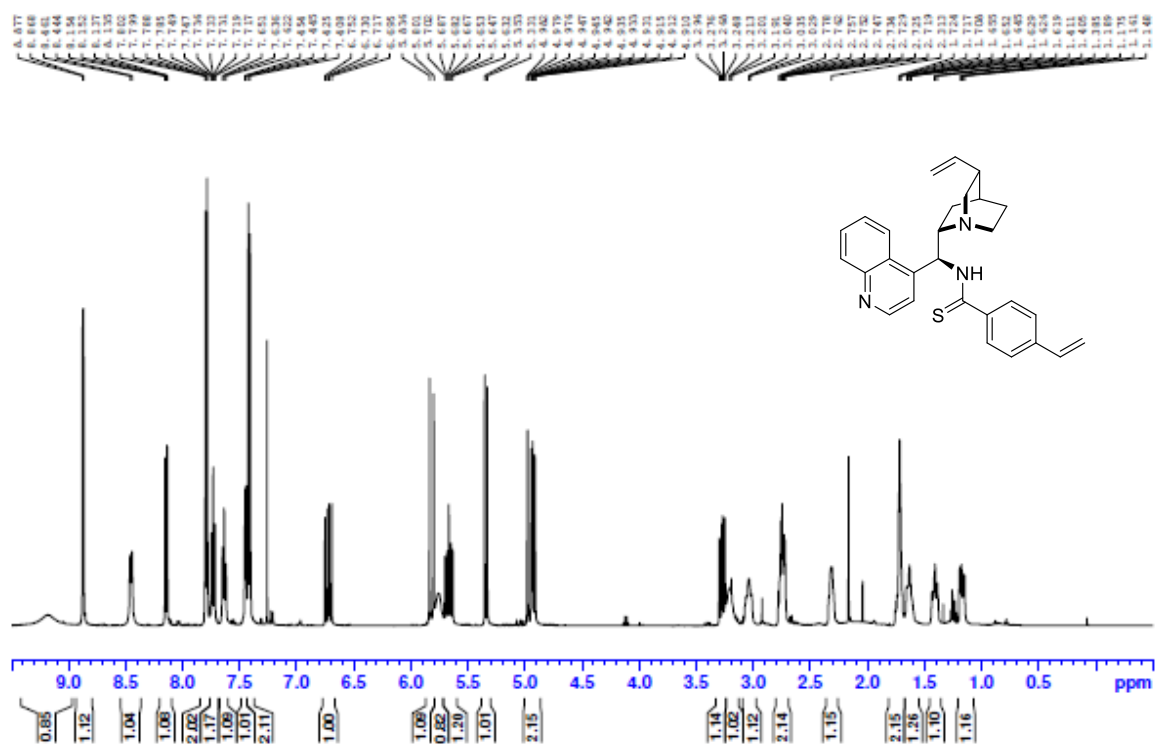

Supplement: s1 [file s1]
